# Supplementary material
Source: Research Square preprint supplement (doi:10.21203/rs.3.rs-9335292/v1)
Supplement: Supplementary file 1 [file 021e99c56ca128627d8823f3.docx]

**Table 1.** Thematic analysis of dynamic pricing

| **THEME** | **SUBTHEMES (Grouped)** | **REFERENCES** |
| --- | --- | --- |
| **Dynamic Pricing & Revenue Management** | Dynamic pricing models, continuous pricing, nonlinear pricing, heuristic pricing, EMSR, markdown pricing, price volatility, price optimization | Schur (2025); Morlotti & Mantin (2025); Meyer et al. (2025); Moshtagh et al. (2025); Talluri (2014); Cohen et al. (2020); Weatherford (2017); Szymański & Belobaba (2021); Gallego & Wang (2014); Lieberman (2016); Cohen et al. (2020); Morlotti et al. (2024); Talluri (2014); Aslani et al. (2018) |
| **Consumer Behaviour, Fairness & Perception** | Price fairness, reference price effects, bounded rationality, trust, privacy concerns, loss aversion, consumer acceptance, behavioural biases | Xiao et al. (2025); Qi et al. (2024); Milman & Tasci (2023); Richards et al. (2016); Schmidt et al. (2020); Hu & Nasiry (2018); Alderighi et al. (2022); Jiang & Erdem (2018); Meatchi & Camus (2020); Xia & Monroe (2017); Malc et al. (2016); Chung (2017) |
| **Personalized, Algorithmic & AI-Driven Pricing** | Personalized pricing, algorithmic pricing, reinforcement learning, AI-driven segmentation, big-data pricing, computational pricing networks | Zhang et al. (2025); Xu et al. (2025); Wang et al. (2023); Vomberg et al. (2024); Gerlick & Liozu (2020); Lin et al. (2024); Heidary et al. (2024); Hajihashemi et al. (2022); Hansen et al. (2021); Cohen et al. (2020); Balseiro et al. (2021) |
| **Strategic Consumers & Intertemporal Decisions** | Strategic waiting, advance selling, anticipation, patience, demand learning, intertemporal reference prices, timing decisions | Lange & Schlosser (2025); Li et al. (2025); Correa et al. (2024); Cachon & Feldman (2015); Lobel (2020); Golrezaei et al. (2020); Arenoe & Van der Rest (2020); Liu & Cooper (2015); Kabul & Parlaktürk (2019); Wu et al. (2015) |
| **Hospitality, Tourism & Transportation Pricing** | Hotel pricing, airline pricing, OTA strategies, ancillaries, reservations, mobility services, sharing economy, transport pricing | Katz et al. (2025); Lee & Sharma (2025); Mumbower (2025); Currie et al. (2025); Masiero et al. (2020); Milman et al. (2023); Webb et al. (2022); Belobaba et al. (2018); Vinod et al. (2018); Nicolau et al. (2023); Bayliss et al. (2019) |
| **Supply Chain, Inventory & Perishable Goods Pricing** | Inventory-linked pricing, perishables, deterioration, coordination, trade-ins, remanufacturing, dual-channel supply chains | Zhu et al. (2025); Scholz & Elser (2022); Hou & Nie (2024); Tunuguntla et al. (2019); Ranjan & Jha (2022); Dye & Yang (2016); Bi et al. (2017); Li et al. (2023); Wei et al. (2022); Zhang et al. (2019); Liu et al. (2019) |
| **Energy, Smart Grid & Sustainability Pricing** | Dynamic electricity pricing, demand response, smart meters, EV pricing, sustainability, ESG, green consumers | Ali et al. (2025); Yun et al. (2025); Koukouvinos et al. (2025); Jia et al. (2024); Mizutani et al. (2018); Dutta & Mitra (2017); Kong (2014); Andriopoulos et al. (2024); Zhang et al. (2023); Santarromana et al. (2020) |
| **Platforms, Digital Markets & Emerging Technologies** | Platform pricing, digital content pricing, blockchain, Industry 5.0, data licensing, auctions, online retail | Fan & Zhang (2025); Hou et al. (2024); Nikseresht et al. (2024); Xu & Duan (2018); Chen et al. (2024); Majid et al. (2014); Ettl et al. (2020); Victor et al. (2018); Greenstein-Messica & Rokach (2018) |

*Source- Authors’ own work*

**Table 2.** Content analysis of dynamic pricing

| **Power Quotes** | **Open Codes (% freq.)** | **Axial Codes (% freq.)** | **Selective Codes** | **Abductive Reasoning** | **Reference** |
| --- | --- | --- | --- | --- | --- |
| “Prices move with demand: lower prices can pull in the price-sensitive during quiet times, while higher prices capitalize on crowded periods.” (Video 1) | Peak vs. off-peak adjustments (12%) | Demand-responsive pricing (22%) | Revenue Optimization & Market Efficiency | Pricing is seen as a way to balance revenue rather than a fixed value. | Famil Alamdar, (2024) |
| “Establish at least three price levels: low-season, high-season, and regular-period prices.” (Video 1) | Multi-tiered price levels (6%) | Firms operationalise demand heterogeneity into a structured willingness-to-pay segments. | Datta et al., (2025) |
| “Price elasticity matters: demand should rise as price falls, enabling profitable outcomes.” (Video 1) | Price elasticity focus (4%) | Profit emerges because consumer utility thresholds determine the purchase probability. | Morlotti et al., (2024) |
| “When fixed costs stay constant, price adjustments can improve gross margins by elevating revenue during strong demand and protecting utilization during slow periods.” (Video 1) | Balancing fixed costs and utilization (7%) | Capacity utilization and resource allocation (15%) | Pricing helps to soften operational rigidity. | Shin et al., (2024) |
| “Dynamic demand pricing uses computer analysis of historical data and real-time signals to set multiple price levels… so resources are allocated efficiently.” (Video 10) | Efficiency in demand allocation (8%) | Prices serve as guiding signals that help distribute resources in markets. | Golrezaei et al., (2020) |
| “Dynamic Pricing emphasizes real-time responsiveness, agile pricing strategies, and a short-term focus on immediate financial impact.” (Video 2) | Agile and immediate adjustments (10%) | Real-time responsiveness and automation (20%) | Technology & Data-Driven Pricing | Pricing evolves from a managerial choice to an automated system process. | Mohammed & Basak Denizci, (2025) |
| “Brick-and-mortar stores are moving toward digital price tags that can be updated in seconds, enabling rapid price changes.” (Vid 8) | Automated pricing engines (10%) | Continuous price adjustment removes temporal price commitment and stabilizes responsiveness. | Syed et al., (2024) |
| “Uber employs extensive ML to forecast demand and set fares… advanced models predict future market conditions, sometimes pre-empting demand spikes.” (Video 15) | Algorithmic forecasting (9%) | Predictive analytics and AI or ML (18%) | Technology & Data-Driven Pricing | Future demand gradually takes over present demand in pricing considerations. | Prakash et al., (2022) |
| “Price Optimization relies on advanced analytics and predictive modelling alongside granular segmentation and personalization.” (Video 2) | Segmentation and personalization (9%) | Price is seen as a personalized estimate of value. | Vomberg et al., (2024) |
| “By offering lower prices during slow seasons, firms can attract new customer segments who value affordability, while higher prices during peak periods extract greater willingness to pay from others.” (Video 1) | Different customer segments (9%) | Willingness-to-pay variation (17%) | Consumer Behaviour & Perceptions | Firms redistribute surplus across heterogeneous willingness-to-pay segments. | Jost et al., (2022) |
| “If customers anticipate low prices, they might delay purchases, eroding long-run profitability.” (Video 1) | Consumer adaptation (8%) | Consumers thoughtfully adjust their behaviour in response to algorithmic pricing. | Liasidou et al., (2025) |
| “The practice trains visitors to anticipate higher charges, potentially dampening long-term travel interest.” (Video 4) | Transparency and trust (11%) | Fairness and exploitation concerns (20%) | Perceived fairness influences how we accept things. | Xu et al., (2025) |
| “Some families… feel the sticker shock acutely, deciding to skip activities due to affordability constraints.” (Video 3) | Backlash to surges (6%) | Price shocks make us see pricing as a matter of moral judgment. | Dutta et al., (2017) |
| “Two US senators announced they would be launching an investigation into Kroger’s digital price tags.” (Video 12) | Regulatory scrutiny (3%) | Regulation emerges when pricing violates socially accepted price norms. | Jia et al., (2024) |
| “Airbnb applies Smart Pricing to adjust nightly rates due to seasonality, demand, events, and booking lead time.” (Video 5) | Airlines, hotels and ride-hailing (12%) | Travel and hospitality (25%) | Industry Applications & Contexts | Dynamic pricing diffuses across industries through institutional imitation. | Alderighi et al., (2022) |
| “When congestion looms, the price increases, discouraging some users and preserving the quality of the express route.” (Video 9) | Transportation and toll roads (6%) | Price is utilised as a Tool to Manage Demand | Pade et al., (2022) |
| “Kroger employs electronic shelf labels that can reflect higher or lower prices in real time.” (Video 14) | Supermarket digital tags (9%) | Retail and grocery (18%) | Brick and mortar retail adopts platform style market coordination logic. | Li et al., (2025) |
| “Amazon changes prices 2.5 million times a day across all its product lines.” (Video 12) | Online retail (Amazon) (9%) | Frequency evolves into a competitive advantage. | Nikseresht et al., (2024) |
| “A British band’s reunion tickets initially priced modestly, then spiked to hundreds of pounds as demand surged, sparking government scrutiny.” (Video 20) | Concert and movie ticketing (8%) | Entertainment and events (15%) | Algorithms monetise scarcity through real-time willingness to pay revelation. | Kaplan (2022) |
| “A popular US fast-food chain has been making headlines not for its menu but for a plan to charge more for burgers during peak hours.” (Video 11) | Restaurants & food (7%) | Surge pricing expands from exceptional goods to routine consumption contexts. | Diao et al., (2023) |
| “Surge pricing can deter loyal customers… unless paired with transparency and safeguards.” (Video 20) | Price gouging concerns (8%) | Consumer protection and fairness (15%) | Regulatory & Ethical Dimensions | Companies need to find a way to earn profits while also earning the trust and respect of their communities. | Benoit et al., (2020) |
| “Critics warn it could turn everyday groceries into fluctuating, airline-style prices.” (Video 14) | Essential goods ethics (7%) | Moral acceptability depends on the perceived necessity of the product category. | Nikseresht et al., (2024) |
| “There is mounting evidence that [algorithms] can encourage implicit collusion between firms, raising prices overall.” (Video 12) | AI and competition policy (6%) | Algorithmic collusion and oversight (12%) | The market competition is becoming more about how algorithms work together. | Famil Alamdar, (2024) |
| “Implement price-gouging safeguards, alerts, and human oversight thresholds.” (Video 13) | Ethical governance (6%) | Governance is needed to make automation more approachable and trustworthy. | Pade et al., (2022) |
| “A fast-food chain’s all-digital pricing sparked backlash when lunchtime prices were set to rise in real time while customers waited in line.” (Video 10) | Boycotts and complaints (6%) | Consumer backlash and churn (12%) | Challenges & Risks of Implementation | Vivid real-time price increases create a sense of procedural injustice, making customers feel victimized after committing to a purchase, leading to backlash and churn. | Gerlick et al., (2020) |
| “Frequent price swings can feel exploitative and erode trust.” (Video 5) | Trust erosion (6%) | Price volatility undermines relational trust and increases switching intention. | Wei et al., (2024) |
| “Pricing accuracy hinges on reliable, comprehensive data.” (Video 5) | High-quality data need (5%) | Technical or data demands (10%) | Data quality determines the legitimacy of pricing | Wang et al., (2023) |
| “Price conflicts can trigger a race to the bottom among rivals.” (Video 15) | Mispricing and price wars (5%) | Algorithms have the potential to destabilize markets. | Kumar et al., (2018) |

*Source- Authors’ own work*

**Table 3.** Multimodal Critical discourse matrix of top twenty videos on dynamic pricing

| **Discourse Cluster** | **Core Semiotic Metaphor** | **Visual & Character Focus** | **Linguistic & Sonic Strategy** | **Narrative Pattern** | **Emotional Register** | **Ideological Message** |
| --- | --- | --- | --- | --- | --- | --- |
| **Dynamic Pricing as Revenue Intelligence** | Price represents intelligent market signal | Dashboards, charts, analysts, managers, platforms (airlines, hotels) | Technical jargon such as “elasticity”, “yield”, “optimization” and a neutral explanatory tone | Problem (volatile demand) leads to algorithmic response and forms revenue maximization | Rational, managerial and confident | Markets are efficient when prices adapt along with profit optimization is legitimate and necessary **(Videos 1, 2,5,6,9, 15)** |
| **AI-Driven Pricing Platforms** | Algorithm depicts objective decision-maker | Software interfaces, AI tools, digital menus and electronic shelf labels | Data-centric language like “real-time”, “machine learning” and minimal emotional soundscape | Data input leading to automated adjustment and formulates performance outcome | Controlled and technocratic | Technology is neutral, superior, and trustworthy while human bias is removed **(Videos 5, 8, 12, 13, 16, 18)** |
| **Consumer Adaptation Discourse** | Consumer is a rational learner | Families planning outings, riders choosing to wait and shoppers checking prices | Advisory tone such as “plan ahead”, “be flexible” and explanatory narration | Price surprise leads to learning and behavioural adjustment | Pragmatic and mildly instructional | Consumers need to adapt thoughtfully to changing markets **(Videos 1, 3, 7, 10)** |
| **Everyday Life Price Shock** | Price volatility leads to disruption | Families avoiding activities, tourists, diners, and grocery shoppers | Colloquial language like “sticker shock”, “skyrocketed” and journalistic narration | Normal activity often leads to a sudden price increase, causing withdrawal or frustration | Shock, frustration and disbelief | Markets disadvantage ordinary consumers and efficiency have social costs **(Videos 3, 4, 19, 20)** |
| **Fairness and Ethical Backlash** | Dynamic pricing can sometimes feel like exploitation | Protest visuals (described), angry customers and social media reactions | Moralized language: “price gouging”, “unfair”, “greedy” and accusatory tone | Exposure leads to outrage and demand for accountability | Anger, resentment and moral unease | Profit gained without fairness diminishes legitimacy and trust **(Videos 4, 10, 11, 14, 19, 20)** |
| **Essential Goods and Public Sensitivity** | Food and transportation are fundamental human rights | Grocery stores, highways, fast food counters and public infrastructure | Policy-oriented language along with cautious and evaluative tone | Innovation raises public concern and lead to political scrutiny | Anxiety and vigilance | Pricing essentials remind us of our ethical and civic responsibilities **(Videos 9, 11, 12, 14)** |
| **Regulatory and Policy Discourse** | Regulation acts as corrective guardian | Senators, policy debates, investigations and public hearings | Legal and bureaucratic terminology and maintains a formal tone | Market excess forms inquiry and lead to potential reform | Serious, corrective | Markets need oversight, and without proper checks, unchecked algorithms can endanger public well-being **(Videos 12, 14, 19, 20)** |
| **Transparency and Trust Discourse** | Visibility acts as legitimacy | Price boards, labels, disclosures, explanations | Calls for “clarity”, “explanation”, “disclosure” and calm normative tone | Opaque pricing leads to mistrust and calls for transparency | Cautious and reflective | Trust is built through honest and open communication, not just efficiency **(Videos 11, 12, 13, 19, 20)** |
| **Infrastructure and Social Efficiency Frame** | Price functions as a traffic regulator | Sensors, highways, toll lanes and commuters | Economic–engineering language and measured narration | Congestion acts as a price signal, guiding the system toward balance | Calm and utilitarian | Pricing can promote overall efficiency while still allowing individuals to make their own choices **(Video 9)** |
| **Cumulative meaning construction** | Dynamic pricing is an unavoidable aspect of system logic | Platforms, algorithms, consumers and regulators | Coexistence of managerial and moral vocabularies | Normalization leads to resistance and prompts negotiation | Ambivalent and contested | Digital capitalism must find a balance between fairness and efficiency to stay legitimate **(Videos 1-20)** |

*Source- Authors’ own work*

**Table 4.** TCCM Framework

| **Themes** | **Theories** | **Constructs** | **Methodology** |
| --- | --- | --- | --- |
| - Dynamic Pricing & Revenue Management - Consumer Behaviour, Fairness & Perception - Personalized, Algorithmic & AI-Driven Pricing - Strategic Consumers & Intertemporal Decisions - Hospitality, Tourism & Transportation Pricing - Supply Chain, Inventory & Perishable Goods Pricing - Energy, Smart Grid & Sustainability Pricing - Platforms, Digital Markets & Emerging Technologies | - Revenue management theory - Dynamic pricing theory - Reference price theory - Behavioural economics - Prospect theory - Strategic consumer behaviour theory - Inventory and pricing theory - Price fairness theory - Operations research theory - Algorithmic pricing theory - Reinforcement learning - Bounded rationality theory - Social learning and herding theory - Network effects theory - Platform competition theory - Sustainability and green pricing theory - Ethics and algorithmic decision-making - Social welfare theory | **Independent Variable**   - Dynamic pricing, nonlinear pricing, markdown policy, inventory-based pricing, capacity-driven pricing - Reference price effects, fairness perception, loss aversion, price communication, anchoring - Algorithmic pricing, AI-based decision systems, transparency, data-driven personalization - Strategic waiting, patience, booking window, demand learning - OTA credibility, ancillary pricing, capacity controls, RM practices - Shelf-life, greening effort, inventory age, demand uncertainty - Tariff design, load uncertainty, policy intervention, pricing governance - AI adoption, blockchain, digital platforms, user profiling   **Dependent variables**   - Revenue, profitability, price optimization, forecasting accuracy - Willingness to pay, purchase intention, price acceptance, welfare - Revenue efficiency, trust, ethical perception, decision accuracy - Demand timing, revenue outcomes, pricing effectiveness - Booking decisions, utilization, service profitability - Waste reduction, profit sustainability, inventory efficiency - System efficiency, welfare, demand response, reliability - Engagement, transparency, performance outcomes | **Quantitative (92.91%)**  (Analytical modelling, optimisation, simulation, econometric regression, experiments, SEM)  **Qualitative (1.05%)**  (Interview, Case study)  **Mixed Method (3.67%)**  (Comprised of Survey+ experiment, case study+ quantitative modelling, survey+ AI based modelling, experimental survey+ conjoint analysis)  **Review studies (2.36%)**  (Comprised of Systematic literature review, bibliometric analysis, editorial synthesis) |
| **Context** |
| **Country**   - United States - United Kingdom - Germany - France - China - India - Australia - Canada - Sweden   **Industry**   - Airlines - Hospitality & tourism - Transportation - Energy & smart grids - Retail & e-commerce - Platform markets - Supply chain & logistics |

*Source- Authors’ own work*

**Table 5.** Mapping of dynamic pricing based on SLR, BERTopic, video analysis, TCCM

| **Core Theme** | **Thematic Analysis** | **BERTopic Analysis** | **Video Analysis and MCDA** | **Key Insights** | **TCCM Mapping** | **Independent Variables (IVs)** | **Dependent Variables (DVs)** |
| --- | --- | --- | --- | --- | --- | --- | --- |
| **Dynamic Pricing & Revenue Management** | • Dynamic pricing models  • Nonlinear pricing  • EMSR markdown pricing  • Price volatility  • Price optimization | • Demand-based pricing  • Peak–off-peak pricing  • Price adjustment frequency  • Yield optimization | • Demand-responsive pricing  • Multi-tier price levels  • Elasticity-based revenue extraction  • Capacity utilization | • Demand-responsive pricing improves revenue extraction during peak demand  • Protects utilization during low-demand periods | **Theory**  • Revenue Management Theory  •Dynamic Pricing Theory **Constructs**  •Dynamic pricing  • Capacity-driven pricing  • Markdown policy  **Methods**  • Analytical modelling  •Optimization  •Simulation  **Contexts**  • Airlines  •Hospitality  •Transportation | • Dynamic pricing intensity  • Price adjustment frequency  • Capacity-based pricing  • Demand elasticity | •Revenue  •Profitability  •Capacity utilization  •Forecasting accuracy |
| **Technology & AI-Driven Pricing** | •Algorithmic pricing  • AI-driven segmentation • Big-data pricing  •Computational pricing networks | • AI pricing engines  • Real-time data usage  • ML-based forecasting  •Personalization | • Automated pricing engines  • Real-time responsiveness  • Predictive analytics  •Personalization logic | • Automated pricing engines enable rapid price adjustments  • Improve predictive demand management | **Theory**  • Algorithmic Pricing Theory  • Reinforcement Learning  • Operations Research **Constructs**  • AI-based decision systems  • Transparency •Personalization  **Methods**  • Econometric modelling  • ML-based simulations **Contexts**  • Retail  • Ride-hailing  • E-commerce | • Algorithmic pricing adoption  • Real-time data integration  • AI/ML forecasting capability  • Automation level | • Revenue efficiency  • Pricing accuracy  • Decision speed  • Perceived operational effectiveness |
| **Consumer Behaviour, Fairness & Perception** | • Price fairness • Reference prices  • Trust  • Privacy concerns  • Loss aversion  • Bounded rationality | • Fairness perception  • Trust erosion  • Reference price shifts  • Price acceptance | •Willingness to pay variation  • Consumer adaptation  • Backlash to surges •Transparency concerns | •Consumers exhibit backlash when price surges violate fairness norms  •Deviations from reference prices reduce acceptance | **Theory**  • Prospect Theory  • Reference Price Theory  • Behavioural Economics **Constructs**  • Fairness perception  • Trust  • Price acceptance  **Methods**  • Experiments  • Surveys  • SEM  **Contexts**  • Digital markets  • Physical service markets | • Price transparency  • Personalization depth  • Reference price deviation  • Surge magnitude | • Willingness to pay  • Purchase intention  • Trust  • Perceived fairness |
| **Strategic Consumers & Intertemporal Decisions** | • Strategic waiting  • Advance selling  • Anticipation • Patience  • Demand learning | • Timing strategies  • Booking windows  •Expectation formation | • Delayed purchase behaviour  •Anticipation of discounts  • Long-run profitability risks | •Anticipation of price drops induces purchase delay  • Weakens long-term revenue sustainability | **Theory**  • Strategic Consumer Behaviour Theory  • Intertemporal Choice Theory  **Constructs**  • Strategic waiting  • Booking timing  **Methods**  • Game-theoretic models  • Simulations  **Contexts**  • Airlines  • Ticketing  • Events | • Advance selling policies • Discount anticipation  • Price volatility  • Booking window length | • Demand timing  • Strategic waiting  • Long-term revenue outcomes |
| **Industry Applications & Contextualisation** | • Hospitality  • Tourism  •Transportation • Retail  •Entertainment • Food services | • Airline pricing  • OTA pricing  • Surge pricing  • Digital retail tags | • Airlines and hotels  • Ride-hailing surge pricing  • Grocery digital tags  • Event ticket spikes | • Pricing effectiveness varies across industries  • Context shapes consumer and revenue outcomes | **Theory**  • Industry-specific RM & Pricing Theories  **Constructs**  • Capacity control  • Ancillary pricing  • Utilization  **Methods**  • Case-based quantitative modelling  **Contexts**  • Travel  • Retail  • Mobility  • Entertainment | • Industry type  • Capacity constraints  • Perishability  • Demand uncertainty | • Booking decisions  • Utilization rates  • Service profitability |
| **Regulatory & Ethical Dimensions** | • Price gouging • Consumer protection  • Algorithmic collusion  • Ethical pricing | • Regulation • Oversight  • Fairness norms  • Governance | • Regulatory scrutiny  • Ethical safeguards  • AI collusion risks  • Essential goods pricing | • Regulatory scrutiny intensifies under perceived exploitation  • Ethics influence legitimacy | **Theory**  • Price Fairness Theory  • Ethics in Algorithmic Decision-Making  • Social Welfare Theory **Constructs**  • Ethical perception  • Governance mechanisms  **Methods**  • Policy analysis  • Conceptual synthesis **Contexts**  • Public policy  • Competition law | • Pricing governance mechanisms  • Price-gouging safeguards  • Regulatory oversight  • Algorithmic transparency | • Consumer trust  • Ethical perception  • Regulatory legitimacy  • Welfare outcomes |
| **Challenges & Risks of Implementation** | • Trust erosion • Consumer backlash  • Data quality issues  • Price wars | • Volatility risk  • Trust loss  • Mispricing  • Data dependency | • Boycotts  • Complaints  • Churn  • Race-to-bottom dynamics | • Opaque and frequent price changes trigger backlash  • Increase churn and reputational risk | **Theory**  • Bounded Rationality Theory  • Risk Theory  **Constructs**  • Trust erosion  • Data reliability  **Methods**  • Empirical modelling  • Simulations  **Contexts**  • Platform markets  • Retail  • Services | • Price fluctuation frequency  • Data quality  • Algorithmic aggressiveness  • Competitive intensity | • Trust erosion  • Customer churn  • Price wars  • Reputational risk |
| **Platforms, Digital Markets & Emerging Technologies** | • Platform pricing  • Digital markets  • Blockchain  • Industry 5.0  • Data licensing | • Platform competition  • Network pricing  • Algorithmic coordination | • Algorithmic coordination  • Platform power  •Personalization at scale | • Platform pricing enhances engagement  • Raises concerns of market power abuse | **Theory**  • Network Effects Theory  • Platform Competition Theory  **Constructs**  • Platform pricing  • User profiling  **Methods**  • Econometric models  • Computational models  **Contexts**  • Digital platforms  • E-commerce | • Platform pricing power  • Network effects  • User profiling intensity  • Data ownership | • User engagement  • Platform performance  • Market efficiency |

*Source- Authors’ own work*

**Table 6. Future research directions: Dynamic Pricing**

| **Research Direction** | **Description** | **Suggested Methodologies** | **Relevance or Logic** |
| --- | --- | --- | --- |
| AI Transparency and Explainable Dynamic Pricing | Investigate how explainable AI (XAI) can improve transparency in algorithmic pricing systems. Research could explore how consumers and regulators respond to interpretable pricing algorithms and whether transparency mitigates trust erosion and fairness concerns. | Experiments, survey-based SEM, machine learning interpretability models, behavioral experiments | As AI-driven pricing becomes widespread, opacity in algorithms raises ethical and trust issues. Studying explainability can help firms balance efficiency with transparency and regulatory compliance. |
| Consumer Fairness Perception in Personalized Pricing | Examine how consumers perceive fairness when prices are personalized using behavioral and demographic data. Future research can analyze thresholds where personalization becomes unacceptable or triggers backlash. | Controlled experiments, conjoint analysis, surveys, behavioral lab studies | Personalized pricing is expanding through big data and AI, but it risks triggering fairness concerns. Understanding fairness thresholds is essential to maintain consumer trust and acceptance. |
| Strategic Consumer Learning in Algorithmic Pricing Environments | Explore how consumers adapt their purchase timing strategies when they learn about dynamic pricing algorithms (e.g., strategic waiting or deal anticipation). | Game-theoretic modelling, agent-based simulations, longitudinal consumer data analysis | As consumers become more aware of dynamic pricing mechanisms, strategic behavior may reduce revenue efficiency, making it critical to understand long-term demand responses. |
| Cross-Industry Dynamic Pricing Effectiveness | Conduct comparative studies across industries such as airlines, hospitality, ride-hailing, retail, and entertainment to identify contextual differences in pricing effectiveness and consumer response. | Cross-industry comparative studies, panel data analysis, mixed-methods | Dynamic pricing outcomes vary across industries due to perishability, demand volatility, and service characteristics, making cross-context comparisons valuable for theory development. |
| Ethical Governance and Regulation of Algorithmic Pricing | Examine how regulatory frameworks and governance mechanisms can mitigate risks such as algorithmic collusion, price gouging, and unfair surge pricing. | Policy analysis, legal-economic modelling, multi-stakeholder interviews | Increasing regulatory scrutiny around algorithmic pricing makes governance research crucial to ensure ethical market practices and consumer protection. |
| Platform-Based Dynamic Pricing Ecosystems | Investigate how dynamic pricing operates within digital platforms (e.g., ride-hailing, e-commerce marketplaces) where network effects, data ownership, and platform power influence price formation. | Econometric modelling, computational simulations, platform data analysis | Platform economies amplify the impact of dynamic pricing due to network effects and data concentration, making this a critical emerging research area. |
| Consumer Trust Recovery after Pricing Backlash | Study mechanisms through which firms can rebuild consumer trust after dynamic pricing controversies or perceived unfair pricing events. | Experimental research, case studies, longitudinal surveys | Price spikes and opaque pricing frequently lead to consumer backlash. Understanding recovery strategies is essential for sustaining long-term customer relationships. |
| Data Quality and Algorithmic Decision Risks in Dynamic Pricing | Explore how data quality, model bias, and algorithmic errors affect pricing decisions and business performance in dynamic pricing systems. | Simulation models, ML robustness testing, empirical data analysis | Dynamic pricing systems depend heavily on large datasets. Poor data quality or biased algorithms may lead to mispricing, revenue loss, or reputational damage. |
| Sustainability and Social Welfare Implications of Dynamic Pricing | Examine how dynamic pricing affects social welfare, accessibility of essential services, and sustainability goals, particularly during crises or demand shocks. | Policy simulations, social welfare modelling, experimental economics | Dynamic pricing can create ethical dilemmas in essential services (transport, healthcare, energy). Studying social welfare impacts is vital for responsible pricing strategies. |
| Human–AI Collaboration in Pricing Decisions | Investigate hybrid decision systems where human managers collaborate with AI pricing engines to balance analytical efficiency with strategic judgment. | Mixed-methods, field experiments, decision science modelling | As organizations adopt automated pricing systems, understanding the optimal balance between algorithmic decision-making and managerial oversight becomes increasingly important. |

*Source- Authors’ own work*
